# Supplementary material for: Nano-inclusions: a novel approach to tune the thermal conductivity of In2O3
Source: Royal Society of Chemistry journal article supplement (doi:10.1039/c3cp52942h), 2013-01-01
Supplement: c3cp52942h.pdf [file c3cp52942h.pdf]

## Nano-inclusions: a novel approach to tune the thermal conductivity of the $\text{In}_2\text{O}_3$

Wei Xu,<sup>\*a</sup> Yong Liu,<sup>\*b</sup> Bo Chen,<sup>b</sup> Da-Bo Liu,<sup>c</sup> Yuan-Hua Lin<sup>d</sup> and Augusto Marcelli<sup>e,f</sup>

<sup>a</sup>Beijing Synchrotron Radiation Facility, Institute of High Energy Physics, Chinese Academy of Sciences, Beijing, 100049, China Fax: +86-10-88235294; Tel: +86-10-88235156; E-mail: xuw@mail.ihep.ac.cn

<sup>b</sup>Laboratory of Structural Steel, Functional Materials and Heat Treatment Processing Technology, Beijing Institute of Aeronautical Materials, Beijing 100095, P. R. China. Tel: 0086-10-62497591; E-mail: liuy431@gmail.com

<sup>c</sup>State Key Laboratory of New Ceramics and Fine Processing, Department of Materials Science and Engineering, Tsinghua University, Beijing, 100084, P.R. China

<sup>d</sup>INFN – Laboratori Nazionali di Frascati, Via E. Fermi 40, 00044 Frascati, Rome, Italy

<sup>e</sup>National Synchrotron Radiation Laboratory, University of Science and Technology of China, Hefei 230026, P.R. China

Figure.S1

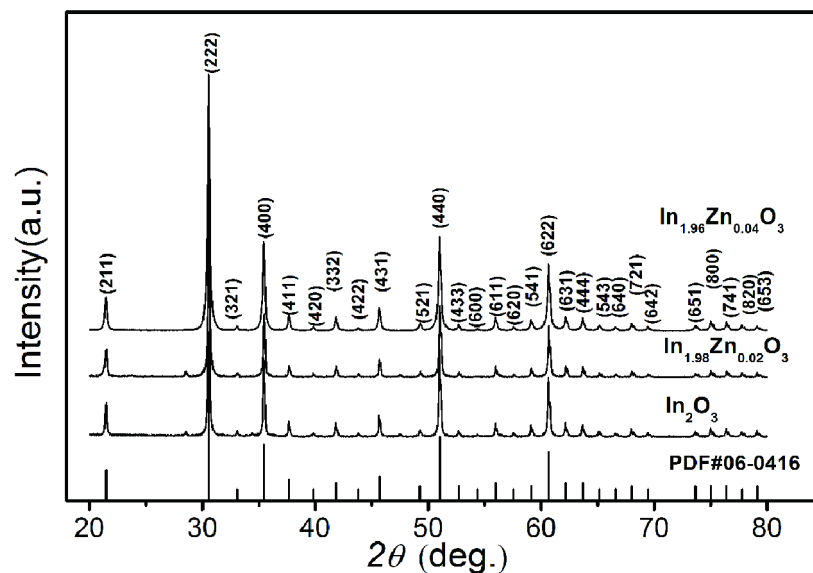

Figure.S1 XRD patterns of  $\text{In}_2\text{O}_3$ ,  $\text{In}_{1.98}\text{Zn}_{0.02}\text{O}_3$  e  $\text{In}_{1.96}\text{Zn}_{0.04}\text{O}_3$ . Data have been indexed using the card JCPDS #06-0416. The ZnO contribution is not detectable in these XRD spectra.
